# Supplementary material
Source: PubMed Central journal article supplement (PMC3623692)
Supplement: NIHMS444264-supplement-Supplement.pdf [file NIHMS444264-supplement-Supplement.pdf]

# Supplement to “Relationship between Hot Spot Residues and Ligand Binding Hot Spots in Protein-Protein Interfaces”

Brandon S. Zerbe,<sup>†</sup> David R. Hall,<sup>†</sup> Sandor Vajda,<sup>\*,†,‡</sup> Adrian Whitty,<sup>\*,‡</sup> and Dima Kozakov<sup>\*,†</sup>

*Department of Biomedical Engineering, Boston University, Boston, MA, 02215, United States,  
and Department of Chemistry, Boston University, Boston, MA, 02215, United States*

E-mail: vajda@bu.edu; whitty@bu.edu; midas@bu.edu

---

\*To whom correspondence should be addressed

<sup>†</sup>BU BME

<sup>‡</sup>BU CHEM

Table S1: End group atom from the standard PDB used to represent each of the 18 amino acids (not including alanine and glycine).

| <b>Residue</b> | <b>End group atom</b> |
|----------------|-----------------------|
| Arg            | CZ                    |
| Asn            | ND2                   |
| Asp            | OD1                   |
| Cys            | SG                    |
| Gln            | CD                    |
| Glu            | CD                    |
| His            | CG                    |
| Ile            | CD1                   |
| Leu            | CG                    |
| Lys            | NZ                    |
| Met            | CE                    |
| Phe            | CG                    |
| Pro            | CG                    |
| Ser            | OG                    |
| Thr            | OG1                   |
| Trp            | CH2                   |
| Tyr            | OH                    |
| Val            | CG1                   |

Table S2: Identity, change in Gibbs free energy of the complex or energy class, and density correlation for all hot spot residues within the data set.

| PDB(chain) | Residue | Energy<br>( $\frac{\text{kcal}}{\text{mol}}$ or class) | Density<br>Correlation |
|------------|---------|--------------------------------------------------------|------------------------|
| 1a4y(A)    | Tyr434  | 3.3                                                    | 19899                  |
| 1a4y(A)    | Asp435  | 3.5                                                    | 10886                  |
| 1brs(D)    | Tyr29   | 3.4                                                    | 14233                  |
| 1brs(D)    | Asp35   | 4.5                                                    | 17075                  |
| 1brs(D)    | Asp39   | 7.7                                                    | 6733                   |
| 1bxl(B)    | Val574  | S                                                      | 9164                   |
| 1bxl(B)    | Leu578  | S                                                      | 19704                  |
| 1bxl(B)    | Ile581  | S                                                      | 18430                  |
| 1bxl(B)    | Ile585  | S                                                      | 11126                  |
| 1cbw(D)    | Lys15   | 2.0                                                    | 9323                   |
| 1cdl(E)    | Trp800  | S                                                      | 14951                  |
| 1cdl(E)    | Ile810  | S                                                      | 5214                   |
| 1cdl(E)    | Leu813  | S                                                      | 3951                   |
| 1dfj(I)    | Trp259  | 2.2                                                    | 0                      |
| 1dfj(I)    | Tyr430  | 5.9                                                    | 8798                   |
| 1dfj(I)    | Asp431  | 3.6                                                    | 10590                  |
| 1dfj(I)    | Tyr433  | 2.6                                                    | 613                    |
| 1dva(X)    | Leu2    | S                                                      | 26103                  |
| 1dva(X)    | Trp11   | S                                                      | 8656                   |
| 1dva(X)    | Tyr12   | S                                                      | 9656                   |
| 1dva(X)    | Phe15   | S                                                      | 5016                   |
| 1ebp(C)    | Trp13   | S                                                      | 1805                   |
| 1f47(A)    | Ile8    | 2.5                                                    | 28637                  |
| 1f47(A)    | Phe11   | 2.5                                                    | 3859                   |
| 1f47(A)    | Leu12   | 2.3                                                    | 976                    |
| 1nfi(F)    | Tyr181  | S                                                      | 3646                   |
| 1osg(G)    | Asp26   | S                                                      | 65                     |
| 1osg(G)    | Leu28   | S                                                      | 29450                  |
| 1osg(G)    | Val29   | S                                                      | 6012                   |
| 1osg(G)    | Arg30   | S                                                      | 11395                  |
| 1osg(G)    | Val33   | S                                                      | 0                      |
| 1ycr(B)    | Phe19   | S                                                      | 23625                  |
| 1ycr(B)    | Trp23   | S                                                      | 33083                  |
| 1ycr(B)    | Leu26   | 2.39                                                   | 13361                  |
| 2ptc(I)    | Lys15   | 10                                                     | 7051                   |
| 3brv(A,C)  | Trp739  | S                                                      | 1468                   |
| 3brv(A,C)  | Trp741  | S                                                      | 6658                   |

Table S3: Identity, change in Gibbs free energy of the complex or energy class, and density correlation for all hot spot residues within the data set.

| PDB(chain) | Residue | Energy<br>( $\frac{\text{kcal}}{\text{mol}}$<br>or class) | Density<br>Correlation |
|------------|---------|-----------------------------------------------------------|------------------------|
| 1a4y(A)    | Trp261  | 0.10                                                      | 0                      |
| 1a4y(A)    | Trp263  | 1.20                                                      | 0                      |
| 1a4y(A)    | Ser289  | 0.00                                                      | 0                      |
| 1a4y(A)    | Trp318  | 1.50                                                      | 0                      |
| 1a4y(A)    | Lys320  | -0.30                                                     | 0                      |
| 1a4y(A)    | Glu344  | 0.20                                                      | 0                      |
| 1a4y(A)    | Trp375  | 1.00                                                      | 0                      |
| 1a4y(A)    | Glu401  | 0.90                                                      | 0                      |
| 1a4y(A)    | Tyr437  | 0.80                                                      | 2108                   |
| 1a4y(A)    | Ile459  | 0.70                                                      | 43                     |
| 1brs(D)    | Thr42   | 1.80                                                      | 78                     |
| 1brs(D)    | Glu76   | 1.30                                                      | 0                      |
| 1bxl(B)    | Arg576  | N                                                         | 0                      |
| 1bxl(B)    | Ile580  | N                                                         | 0                      |
| 1bxl(B)    | Asp584  | N                                                         | 0                      |
| 1cbw(D)    | Thr11   | 0.20                                                      | 0                      |
| 1cbw(D)    | Arg17   | 0.50                                                      | 442                    |
| 1cbw(D)    | Arg39   | 0.20                                                      | 0                      |
| 1cdl(E)    | Lys799  | N                                                         | 0                      |
| 1cdl(E)    | Lys802  | N                                                         | 0                      |
| 1cdl(E)    | Arg808  | N                                                         | 0                      |
| 1dfj(I)    | Glu202  | 1.0                                                       | 0                      |
| 1dfj(I)    | Trp257  | 1.3                                                       | 0                      |
| 1dfj(I)    | Glu283  | 1.3                                                       | 0                      |
| 1dfj(I)    | Ser285  | 0.8                                                       | 0                      |
| 1dfj(I)    | Trp314  | 1.0                                                       | 0                      |
| 1dfj(I)    | Lys316  | 1.3                                                       | 0                      |
| 1dfj(I)    | Glu397  | 1.3                                                       | 0                      |
| 1dfj(I)    | Arg453  | 0.8                                                       | 0                      |
| 1dfj(I)    | Ile455  | 0.3                                                       | 3                      |
| 1dva(X)    | Arg7    | N                                                         | 7                      |
| 1dva(X)    | Val8    | N                                                         | 299                    |
| 1dva(X)    | Asp9    | N                                                         | 75                     |
| 1ebp(C)    | Leu11   | N                                                         | 316                    |
| 1ebp(C)    | Thr12   | N                                                         | 0                      |
| 1f47(A)    | Asp4    | 0.7                                                       | 0                      |
| 1f47(A)    | Tyr5    | 0.9                                                       | 0                      |
| 1f47(A)    | Leu6    | 0.9                                                       | 12730                  |
| 1f47(A)    | Gln15   | 0.0                                                       | 0                      |
| 1lqb(D)    | Met561  | N                                                         | 0                      |
| 1lqb(D)    | Leu562  | N                                                         | 1896                   |
| 1nfi(F)    | Cys215  | N                                                         | 3832                   |
| 1osg(G)    | Leu27   | N                                                         | 3                      |
| 1osg(G)    | His31   | N                                                         | 1                      |
| 1ycr(B)    | Glu17   | 0.14                                                      | 0                      |
| 1ycr(B)    | Thr18   | 0.58                                                      | 0                      |
| 1ycr(B)    | Ser20   | -0.43                                                     | 0                      |
| 1ycr(B)    | Leu22   | 0.37                                                      | 0                      |
| 1ycr(B)    | Leu25   | 0.30                                                      | 0                      |
| 1ycr(B)    | Pro27   | -1.26                                                     | 548                    |
| 1ycr(B)    | Glu28   | -0.36                                                     | 0                      |
| 3brv(A,C)  | Leu737  | N                                                         | 89                     |
| 3brv(A,C)  | Leu742  | N                                                         | 441.5                  |
